# Supplementary material
Source: HighWire-hosted journal article supplement (https://cmajopen.ca/highwire/filestream/84913/field_highwire_adjunct_files/6/CMAJOpen-2020-0177-4-at.pdf)
Supplement: CMAJOpen-2020-0177-4-at.pdf [file CMAJOpen-2020-0177-4-at.pdf]

**Appendix 4 (as supplied by the authors):** Detailed Blinder-Oaxaca decomposition results for psychological distress scale

|                                  | Total                  |                        |                      | Women                  |                        |                      | Men                    |                        |                     |
|----------------------------------|------------------------|------------------------|----------------------|------------------------|------------------------|----------------------|------------------------|------------------------|---------------------|
|                                  | Coefficients           | Blinder-Oaxaca         |                      | Coefficients           | Blinder-Oaxaca         |                      | Coefficients           | Blinder-Oaxaca         |                     |
| Explained                        |                        | Unexplained            | Explained            |                        | Unexplained            | Explained            |                        | Unexplained            |                     |
| <b>Indigenous Identity</b>       |                        |                        |                      |                        |                        |                      |                        |                        |                     |
| Indigenous (Ref.)                |                        |                        |                      |                        |                        |                      |                        |                        |                     |
| Non-Indigenous                   | -0.3800<br>(0.2990)    |                        |                      | -0.5550<br>(0.4470)    |                        |                      | -0.1780<br>(0.4010)    |                        |                     |
| <b>Demographic Variables</b>     |                        |                        |                      |                        |                        |                      |                        |                        |                     |
| Gender                           |                        |                        |                      |                        |                        |                      |                        |                        |                     |
| Male                             | -0.4470***<br>(0.1270) | 0.0052***<br>(0.0015)  | 0.0126<br>(0.1380)   |                        |                        |                      |                        |                        |                     |
| Female                           |                        | 0.0052***<br>(0.0015)  | -0.0118<br>(0.1290)  |                        |                        |                      |                        |                        |                     |
| Age                              | -0.0540***<br>(0.0056) | -0.3250***<br>(0.0345) | 0.1430<br>(1.059)    | -0.0665***<br>(0.0084) | -0.4360***<br>(0.0544) | -2.0920<br>(1.5940)  | -0.0403***<br>(0.0072) | -0.2150***<br>(0.0417) | 2.2810*<br>(1.2030) |
| Marital Status                   |                        |                        |                      |                        |                        |                      |                        |                        |                     |
| Married or common law (Ref.)     |                        | 0.0007<br>(0.0043)     | 0.7190**<br>(0.3430) |                        | 0.0100<br>(0.0079)     | 1.1270**<br>(0.5740) |                        | -0.0065<br>(0.0048)    | 0.0121<br>(0.4180)  |
| Divorced or widowed              | 0.0273<br>(0.2990)     | -0.0006<br>(0.0031)    | -0.1070<br>(0.0820)  | -0.2300<br>(0.4370)    | -0.0002<br>(0.0034)    | -0.2050<br>(0.1720)  | 0.4130<br>(0.4320)     | 0.0017<br>(0.0047)     | -0.0165<br>(0.0585) |
| Single                           | 0.0345<br>(0.2690)     | 6.48e-05<br>(0.006)    | -0.0777<br>(0.1770)  | -0.5270<br>(0.4110)    | 0.0146<br>(0.0094)     | -0.1790<br>(0.2240)  | 0.5650<br>(0.3460)     | -0.0098<br>(0.0071)    | 0.0666<br>(0.2190)  |
| <b>Socioeconomic Variables</b>   |                        |                        |                      |                        |                        |                      |                        |                        |                     |
| Log Equivalized Household Income | -0.7400***<br>(0.0937) | -0.1320***<br>(0.0179) | 9.6550**<br>(4.7570) | -0.8250***<br>(0.1280) | -0.1320***<br>(0.0219) | 9.8070<br>(6.7930)   | -0.6530***<br>(0.1340) | -0.1330***<br>(0.0287) | 7.3490<br>(5.7150)  |
| Education                        |                        |                        |                      |                        |                        |                      |                        |                        |                     |
| Less than high school (Ref.)     |                        | -0.0086<br>(0.0137)    | 0.0384<br>(0.1270)   |                        | -0.0153<br>(0.0142)    | -0.0110<br>(0.1500)  |                        | 0.0116<br>(0.0184)     | 0.1800<br>(0.1930)  |
| High school                      | -0.5640**<br>(0.2800)  | -0.0046***<br>(0.0017) | 0.0264<br>(0.1110)   | -0.6970<br>(0.4780)    | 0.0062<br>(0.0057)     | 0.0685<br>(0.1990)   | -0.4390<br>(0.3130)    | -0.0264***<br>(0.0096) | 0.0058<br>(0.1030)  |
| Some post-secondary              | 0.3910<br>(0.3450)     | 0.0026**<br>(0.0010)   | -0.0145<br>(0.0522)  | -0.4280<br>(0.5550)    | -0.0005<br>(0.0029)    | 0.0464<br>(0.0664)   | 1.1510***<br>(0.3990)  | 0.0175***<br>(0.0052)  | -0.0952<br>(0.0681) |
| Bachelor's degree or higher      | -0.3710<br>(0.2480)    | -0.0124**<br>(0.0062)  | -0.0776<br>(0.2650)  | -0.6030<br>(0.4540)    | -0.0151<br>(0.0139)    | -0.4450<br>(0.3320)  | -0.1380<br>(0.2360)    | -0.0080*<br>(0.0046)   | 0.5090<br>(0.3920)  |
| Employment Status                |                        |                        |                      |                        |                        |                      |                        |                        |                     |
| Employed (Ref.)                  |                        | -0.0314***             | -0.0511              |                        | 0.0015**               | -0.1570              |                        | -0.0705***             | -0.0890             |

Appendix to: Hajizadeh M, Hu M, Asada Y, et al. Explaining the gaps in psychological distress and suicidal behaviours between non-Indigenous and Indigenous adults living off-reserve in Canada: a cross-sectional study. *CMAJ Open* 2021. DOI:10.9778/cmajo.20200177. Copyright © 2021 The Author(s) or their employer(s). To receive this resource in an accessible format, please contact us at [cmajgroup@cmaj.ca](mailto:cmajgroup@cmaj.ca).

|                                        |                        |                                   |                                 |                        |                                   |                                  |                        |                                |                                 |
|----------------------------------------|------------------------|-----------------------------------|---------------------------------|------------------------|-----------------------------------|----------------------------------|------------------------|--------------------------------|---------------------------------|
| Unemployed                             | 0.4520***<br>(0.1570)  | (0.0055)<br>0.0165***<br>(0.0064) | (0.2990)<br>-0.2320<br>(0.1730) | 0.3040<br>(0.2200)     | (0.0007)<br>0.0182***<br>(0.0066) | (0.4280)<br>-0.5560*<br>(0.3020) | 0.6220***<br>(0.2050)  | (0.0153)<br>0.0107<br>(0.0113) | (0.3730)<br>-0.0112<br>(0.1930) |
| Other employment status                | 1.6880***<br>(0.2720)  | 0.0126***<br>(0.0022)             | 0.0601<br>(0.0616)              | 1.8060***<br>(0.4050)  | 0.0490***<br>(0.0108)             | 0.1090<br>(0.0762)               | 1.6610***<br>(0.3650)  | -0.0147***<br>(0.0038)         | 0.0177<br>(0.0908)              |
| Homeownership                          |                        |                                   |                                 |                        |                                   |                                  |                        |                                |                                 |
| Owner (Ref.)                           |                        | -0.0338***<br>(0.0097)            | -0.1440<br>(0.2480)             |                        | -0.0408**<br>(0.0163)             | 0.2840<br>(0.3220)               |                        | -0.0271**<br>(0.0108)          | -0.4890<br>(0.3420)             |
| Renter                                 | 0.6210***<br>(0.1720)  | -0.0338***<br>(0.0097)            | 0.0738<br>(0.1270)              | 0.6620***<br>(0.2340)  | -0.0408**<br>(0.0163)             | -0.1680<br>(0.1910)              | 0.5760**<br>(0.2490)   | -0.0271**<br>(0.0108)          | 0.2160<br>(0.1510)              |
| Household Arrangement                  |                        |                                   |                                 |                        |                                   |                                  |                        |                                |                                 |
| Single person (Ref.)                   |                        | -0.00017<br>(0.0056)              | 0.0395<br>(0.0989)              |                        | 0.0063<br>(0.0122)                | 0.1570<br>(0.1360)               |                        | -0.0027<br>(0.0034)            | -0.1470<br>(0.1260)             |
| Couple with no child                   | -0.1010<br>(0.2800)    | -0.0105<br>-0.0115                | -0.2220<br>(0.1670)             | -0.0281<br>(0.4240)    | -8.92e-05<br>(0.0040)             | -0.3310<br>(0.3040)              | -0.1660<br>(0.3700)    | -0.0403<br>(0.0255)            | -0.2650*<br>(0.1600)            |
| Couple with child(ren) younger than 25 | -0.4290<br>(0.281)     | 0.0110***<br>(0.0041)             | 0.0216<br>(0.2120)              | -0.707*<br>(0.4120)    | -0.0440***<br>(0.0167)            | -0.0633<br>(0.2360)              | -0.1040<br>(0.387)     | 0.0250<br>(0.0240)             | 0.1080<br>(0.2940)              |
| Separate with a child(ren) younger     | 0.0031<br>(0.3310)     | 0.0012<br>(0.0067)                | 0.0133<br>(0.0771)              | -0.0560<br>(0.4330)    | 0.00270<br>(0.0190)               | 0.0059<br>(0.1560)               | 0.1320<br>(0.4980)     | 3.51e-05<br>(0.0006)           | 0.0569*<br>(0.0320)             |
| Other household compositions           | 0.7000***<br>(0.2520)  | -0.0319***<br>(0.0088)            | 0.0638<br>(0.1210)              | 0.5720*<br>(0.3250)    | -0.0469**<br>(0.0203)             | 0.01530<br>(0.1940)              | 0.9170**<br>(0.3910)   | -0.0151***<br>(0.0052)         | 0.0541<br>(0.1550)              |
| <b>Geographical Factors</b>            |                        |                                   |                                 |                        |                                   |                                  |                        |                                |                                 |
| Urbanicity                             |                        |                                   |                                 |                        |                                   |                                  |                        |                                |                                 |
| Urban                                  | 0.0567<br>(0.1710)     | -0.0001<br>(0.0006)               | -0.2810<br>(0.2360)             | 0.0288<br>(0.2500)     | -4.65e-05<br>(0.0005)             | -0.0609<br>(0.3500)              | 0.1050<br>(0.2240)     | -0.0004<br>(0.0013)            | -0.3700<br>(0.2890)             |
| Rural (Ref.)                           |                        | -0.0001<br>(0.0006)               | 0.0781<br>(0.0655)              |                        | -4.65e-05<br>(0.0005)             | 0.0159<br>(0.0913)               |                        | -0.0003<br>(0.0013)            | 0.109<br>(0.0848)               |
| Geographic Region                      |                        |                                   |                                 |                        |                                   |                                  |                        |                                |                                 |
| Atlantic                               | -0.1740<br>(0.1800)    | 0.0007<br>(0.0007)                | 0.0068<br>(0.0430)              | -0.0054<br>(0.2750)    | 0.00015<br>(0.0004)               | 0.124**<br>(0.0556)              | -0.3380<br>(0.228)     | 0.0016<br>(0.0014)             | -0.0892<br>(0.0622)             |
| Quebec                                 | -0.0900<br>(0.1840)    | -0.0036<br>(0.0191)               | 0.0580<br>(0.0524)              | 0.3750<br>(0.2860)     | 0.0478*<br>(0.0282)               | 0.0232<br>(0.0911)               | -0.5750**<br>(0.2250)  | -0.0600**<br>(0.0247)          | 0.0710<br>(0.0577)              |
| Ontario, (Ref.)                        |                        | 0.0019<br>(0.0038)                | 0.0288<br>(0.1850)              |                        | -0.0111<br>(0.0172)               | -0.1300<br>(0.2130)              |                        | -0.0063<br>(0.0040)            | 0.2050<br>(0.2590)              |
| Prairie                                | 0.1260<br>(0.1780)     | -0.0282<br>(0.0180)               | 0.0098<br>(0.1430)              | 0.1710<br>(0.2590)     | 0.0022<br>(0.0309)                | -0.3540<br>(0.2280)              | 0.0995<br>(0.2420)     | -0.0443**<br>(0.0194)          | 0.3230*<br>(0.1700)             |
| British Columbia                       | -0.1280<br>(0.1930)    | 0.0041<br>(0.0046)                | -0.1210<br>(0.1040)             | 0.0243<br>(0.2830)     | 0.0052<br>(0.0102)                | -0.0194<br>(0.1270)              | -0.2500<br>(0.2600)    | 0.00199<br>(0.0032)            | -0.2020<br>(0.1390)             |
| Constant                               | 15.6000***<br>(1.2300) |                                   | -10.1100**<br>(4.6390)          | 17.4700***<br>(1.7990) |                                   | -7.5980<br>(6.6840)              | 13.1800***<br>(1.6220) |                                | -9.9670*<br>(5.8000)            |

Appendix to: Hajizadeh M, Hu M, Asada Y, et al. Explaining the gaps in psychological distress and suicidal behaviours between non-Indigenous and Indigenous adults living off-reserve in Canada: a cross-sectional study. *CMAJ Open* 2021. DOI:10.9778/cmajo.20200177. Copyright © 2021 The Author(s) or their employer(s). To receive this resource in an accessible format, please contact us at [cmajgroup@cmaj.ca](mailto:cmajgroup@cmaj.ca).

|                             |                       |                        |                     |                       |                        |                     |                      |                        |                     |
|-----------------------------|-----------------------|------------------------|---------------------|-----------------------|------------------------|---------------------|----------------------|------------------------|---------------------|
| <b>Absolute Differences</b> | -0.992***<br>(0.2840) |                        |                     | -1.208***<br>(0.3960) |                        |                     | -0.814**<br>(0.3660) |                        |                     |
| <b>Sum</b>                  |                       | -0.5950***<br>(0.0555) | -0.3970<br>(0.2920) |                       | -0.6190***<br>(0.0826) | -0.5890<br>(0.4070) |                      | -0.6370***<br>(0.0667) | -0.1770<br>(0.3730) |
| <b>n</b>                    | 18,300                |                        |                     | 10,049                |                        |                     | 8,251                |                        |                     |
| <b>R-squared</b>            | 0.0680                |                        |                     | 0.0630                |                        |                     | 0.0810               |                        |                     |

**Note:** Ref. = reference category in the OLS estimation; \*\*\* p<0.01, \*\* p<0.05, \* p<0.1
